# Supplementary material for: Fe3O4@SiO2@polyionene/Br3− core–shell–shell magnetic nanoparticles: a novel catalyst for the synthesis of imidazole derivatives under solvent-free conditions
Source: Royal Society of Chemistry journal article supplement (doi:10.1039/c5nj02680f), 2016-01-01
Supplement: c5nj02680f1.pdf [file c5nj02680f1.pdf]

**Fe<sub>3</sub>O<sub>4</sub>@SiO<sub>2</sub>@PolyIonene/Br<sub>3</sub><sup>-</sup> core-shell-shell magnetic nanoparticles: a novel catalyst for the synthesis of imidazole derivatives in solvent-free conditions**

**Elham Dezfoolnezhad<sup>1,2</sup>, Keivan Ghodrati<sup>3\*</sup>, Rashid Badri<sup>1,2</sup>**

<sup>1</sup> Department of Chemistry, Khuzestan Science and Research Branch, Islamic Azad University, Ahvaz, Iran

<sup>2</sup> Department of Chemistry, Ahvaz Branch, Islamic Azad University, Ahvaz, Iran

<sup>3</sup> Department of Chemistry, Kermanshah Branch, Islamic Azad University, Kermanshah, Iran

**Spectroscopic data:**

*2-(4-Hydroxyphenyl)-1H-benzimidazole* (Table 3, Entry 3):

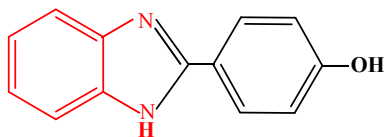

$^1\text{H}$  NMR (200 MHz,  $\text{DMSO-}d_6$ ):  $\delta$  5.04 (br, 1H, OH), 6.91 (d,  $J = 8.7$  Hz, 2H), 7.12-7.21 (m, 2H), 7.48-7.57 (m, 2H), 7.97 (d,  $J = 8.7$  Hz, 2H), 10.02 (br, 1H, NH).  $^{13}\text{C}$  NMR (50 MHz,  $\text{DMSO-}d_6$ ):  $\delta$  120.1, 121.4, 125.9, 127.6, 133.9, 144.2, 157.1, 165.0.

*2-(p-Tolyl)-1H-benzimidazole* (Table 3, Entry 4):

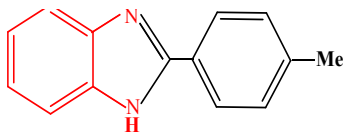

$^1\text{H}$  NMR (200 MHz,  $\text{DMSO-}d_6$ ):  $\delta$  (ppm): 2.57 (s, 3H), 7.14-7.20 (m, 2H), 7.34 (t,  $J = 8.0$  Hz, 2H), 7.49 (t,  $J = 8.0$  Hz, 1H), 7.62 (t,  $J = 8.0$  Hz, 1H), 8.03-8.07 (m, 2H), 12.92 (br, 1H, NH).  $^{13}\text{C}$  NMR (50 MHz,  $\text{DMSO-}d_6$ ):  $\delta$  (ppm): 21.3, 111.5, 119.1, 122.3, 127.3, 129.9, 135.3, 144.2, 151.7.

*2-(4-Chlorophenyl)-1H-benzimidazole* (Table 3, Entry 6):

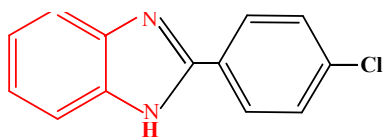

$^1\text{H}$  NMR (200 MHz,  $\text{DMSO-}d_6$ ):  $\delta$  (ppm): 7.35-7.41 (m, 2H), 7.76-7.83 (m, 4H), 8.32-8.39 (m, 2H), 13.17 (br, 1H, NH).  $^{13}\text{C}$  NMR (50 MHz,  $\text{DMSO-}d_6$ ):  $\delta$  (ppm): 111.9, 119.4, 122.3, 123.2, 128.6, 129.5, 135.2, 150.6.

*2-Phenylbenzothiazole* (Table 4, Entry 1):

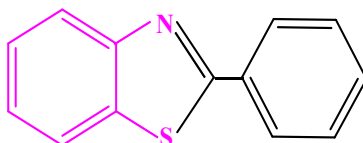

$^1\text{H}$  NMR (200 MHz,  $\text{DMSO-}d_6$ ):  $\delta$  (ppm): 7.54–7.59 (m, 5H), 8.07-8.13 (m, 4H).  $^{13}\text{C}$  NMR (50 MHz,  $\text{DMSO-}d_6$ ):  $\delta$  (ppm): 123.3, 123.8, 126.5, 127.6, 128.1, 130.3, 132.3, 133.7, 135.3, 154.4, 168.2.

*2-(p-Tolyl)benzothiazole* (Table 4, Entry 4) :

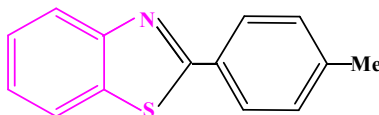

$^1\text{H}$  NMR (200 MHz,  $\text{CDCl}_3$ ),  $\delta$  (ppm): 2.40 (s, 3 H), 7.24-7.48 (m, 4 H), 7.85-8.03 (m, 4 H).  $^{13}\text{C}$  NMR (50 MHz,  $\text{CDCl}_3$ ),  $\delta$  (ppm): 22.0, 122.0, 123.5, 125.4, 126.7, 127.9, 130.2, 131.3, 135.4, 141.9, 154.6, 168.7.

*2-(p-Tolyl)-2,3-dihydro-1H-perimidine* (Table 5, Entry 3):

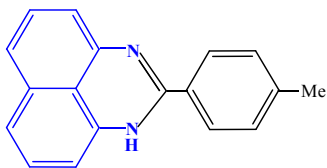

IR (KBr):  $\nu = 3365, 3039, 2922, 1601, 1485, 1417$ .  $^1\text{H NMR}$  (400 MHz,  $\text{DMSO-}d_6$ ):  $\delta$  (ppm): 2.35 (s, 3H,  $\text{CH}_3$ ), 5.34 (s, 1H, CH), 6.49-7.51 (m, 12H,  $\text{CH}_{\text{arom}}$ , 2NH).  $^{13}\text{C NMR}$  (100 MHz,  $\text{DMSO-}d_6$ ):  $\delta$  (ppm): 20.8, 66.6, 104.2, 112.4, 115.1, 126.8, 127.8, 128.7, 134.3, 137.7, 138.8, 143.1.

*2-(3-Nitrophenyl)-2,3-dihydro-1H-perimidine* (Table 5, Entry 5):

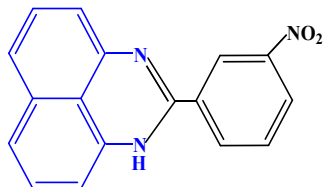

IR (KBr):  $\nu = 3344, 3226, 2821, 1606, 1529, 1415, 1333$ .  $^1\text{H NMR}$  (400 MHz,  $\text{DMSO-}d_6$ ):  $\delta$  (ppm): 5.56 (s, 1H, CH), 6.52-8.45 (m, 12H,  $\text{CH}_{\text{arom}}$ , 2 NH).  $^{13}\text{C NMR}$  (100 MHz,  $\text{DMSO-}d_6$ ):  $\delta$  (ppm): 64.8, 104.6, 112.4, 115.6, 122.6, 123.2, 126.9, 129.9, 134.2, 134.6, 142.2, 144.5, 147.6.

*2-Phenyl-1H-imidazole* (Table 6, Entry 1):

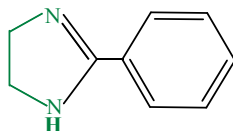

$^1\text{H NMR}$  (200 MHz,  $\text{DMSO-}d_6$ ):  $\delta$  7.19-7.23 (m, 2H), 7.51-7.61 (m, 5H), 8.16-8.21 (m, 2H), 12.91 (br, 1H, NH).  $^{13}\text{C NMR}$  (50 MHz,  $\text{DMSO-}d_6$ ):  $\delta$  120.1, 123.2, 127.0, 127.3, 129.7, 130.7, 131.0, 152.1.

Current Data Parameters  
NAME proton  
CONO 70  
PRONO 1

F2 - Acquisition Parameters  
Date\_ 20130801  
Time 10.51  
INSTRUM spect  
PROBHD 5 mm Nal10m  
PULPROG zg30  
TD 65536  
SOLVENT DMSO  
NS 12  
DS 0  
SWH 5995.204 Hz  
FIDRES 0.091400 Hz  
AQ 5.460700 sec  
RG 382  
DM 83.400 usec  
DE 7.50 usec  
TE 300.0 K  
D1 1.00000000 sec

\*\*\*\*\* CHANNEL f1 \*\*\*\*\*  
NUC1 1H  
P1 19.70 usec  
PL1 -2.00 dB  
SFO1 200.1312453 MHz

F2 - Processing parameters  
SI 32768  
SF 200.1300071 MHz  
WDW EM  
SSB 0  
LB 0.00 Hz  
GB 0  
PC 1.00

1D NMR plot parameters  
CK 20.00 cm  
F1P 10.475 ppm  
F1 2000.37 Hz  
F2P -0.217 ppm  
F2 -0.33 Hz  
PPhM -0.33453 ppm/cm  
HCOH 505.96505 Hz/cm

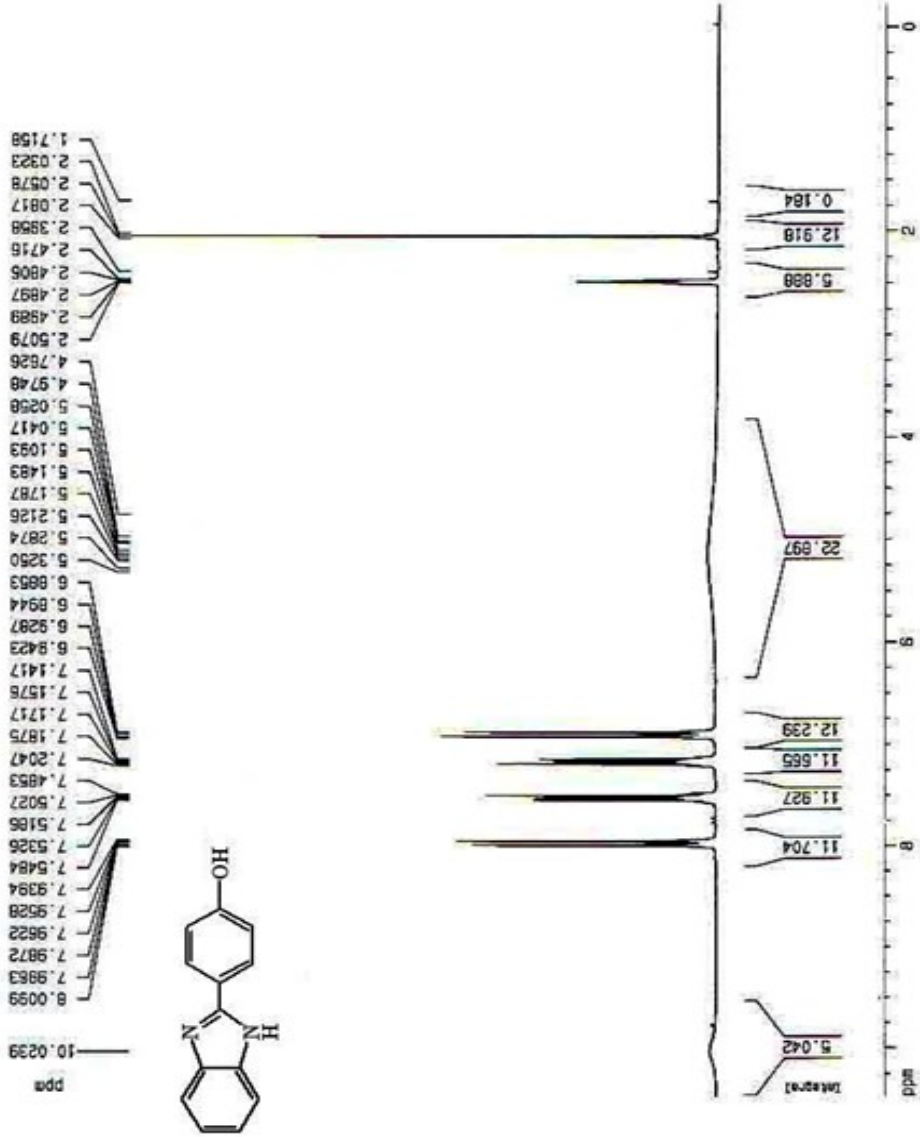

<sup>1</sup>H NMR spectra of 2-(4-Hydroxyphenyl)-1H-benzimidazole

```

Current Data Parameters
NAME: 13C
EXPNO: 25
PROCNO: 1

F2 - Acquisition Parameters
Date_ 20130801
Time 15.13
INSTRUM spect
PROBHD 5 mm MUX113
PULPROG zgpg30
TD 65536
SOLVENT DMSO-D6
NS 4
DS 4
SWH 15662.814 Hz
FIDRES 0.191680 Hz
AQ 2.0082827 sec
RG 32768
DE 39.880 usec
TE 300.0 K
TD 2.00000000 sec
D1 0.03000000 sec
D12 0.00000000 sec

***** CHANNEL f1 *****
NUC1 13C
P1 10.00 usec
PL1 -5.00 dB
SFO1 80.302440 MHz

***** CHANNEL f2 *****
CPDPRG2 MLL115
NUC2 1H
P2 80.00 usec
PL2 190.00 dB
PL12 20.00 dB
PL13 20.00 dB
SFO2 200.136025 MHz

F2 - Processing parameters
SI 32768
SF 50.302440 MHz
AQ 2.0082827 sec
RG 32768
DE 39.880 usec
TE 300.0 K
TD 2.00000000 sec
D1 0.03000000 sec
D12 0.00000000 sec

1D NMR plot parameters
CX 20.00 cm
F1p 254.813 ppm
F1 1816.42 Hz
F2p -14.832 ppm
F2 -746.40 Hz
PPHON 32.48225 ppm/cm
LOCK 880.14060 Hz/CW

```

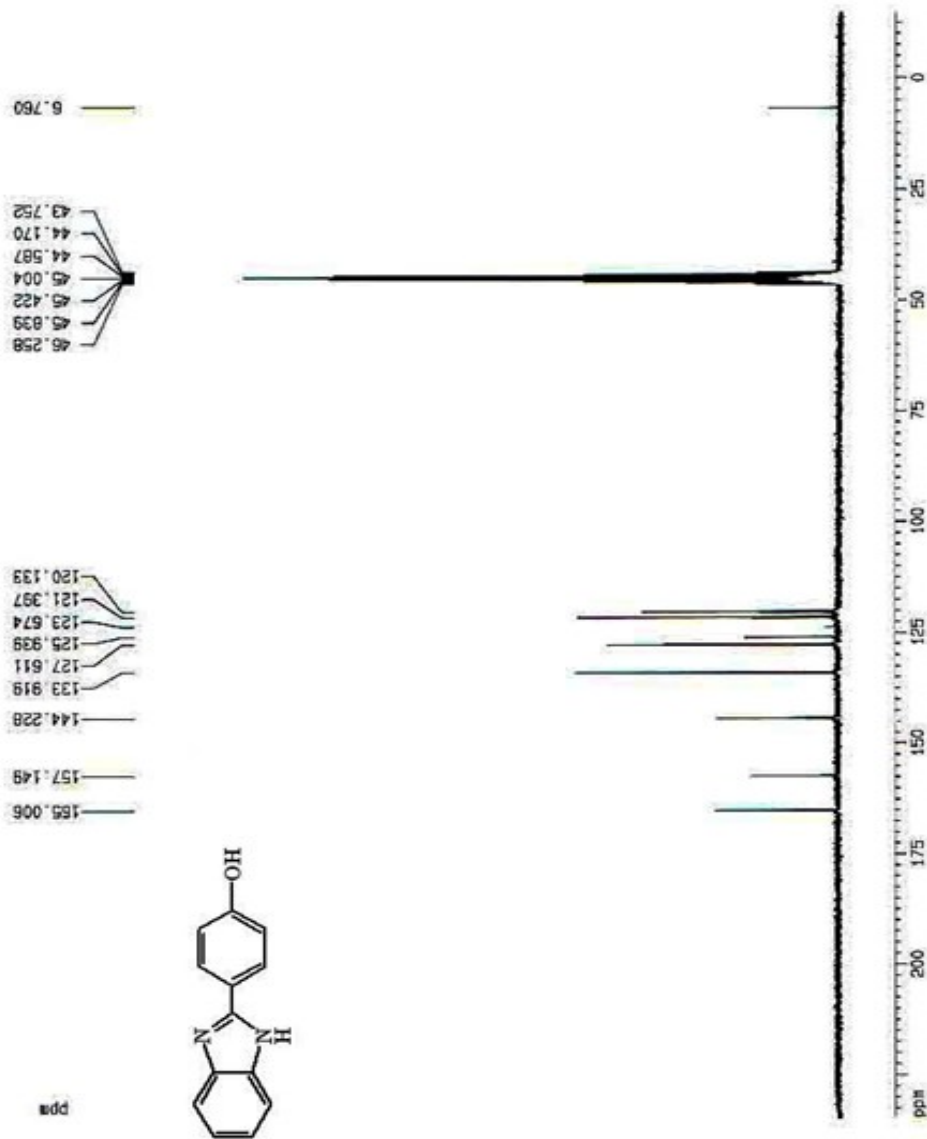

<sup>13</sup>CNMR spectra of 2-(4-Hydroxyphenyl)-1H-benzimidazole

Current Data Parameters  
 NAME HI  
 EXPNO 32  
 PROCNO 1

F2 - Acquisition Parameters  
 Date\_ 20130801  
 Time\_ 12.53  
 INSTRUM spect  
 PROBHD 5 mm Nujolnu  
 PULPROG zg30  
 TD 65536  
 SOLVENT DMSO  
 NS 12  
 DS 0  
 SWH 4139.073 Hz  
 FIDRES 0.063157 Hz  
 AQ 7.918796 sec  
 RG 812.7  
 DM 120.800 usec  
 DE 7.50 usec  
 TE 300.0 K  
 D1 1.00000000 sec

===== CHANNEL f1 =====  
 NUC1 1H  
 P1 10.70 usec  
 PL1 -2.00 dB  
 SFO1 200.131259 MHz

F2 - Processing parameters  
 SI 32768  
 SF 200.1300072 MHz  
 MDN 0  
 SSB 0  
 LB 0.00 Hz  
 BB 0  
 PC 1.00

-----f1 NMR plot parameters-----  
 CX 20.00 cm  
 F1P 13.086 ppm  
 F1 2620.51 Hz  
 F2P -0.675 ppm  
 F2 -135.34 Hz  
 PPMCM 0.68861 ppm/cm  
 HZCM 137.61232 Hz/cm

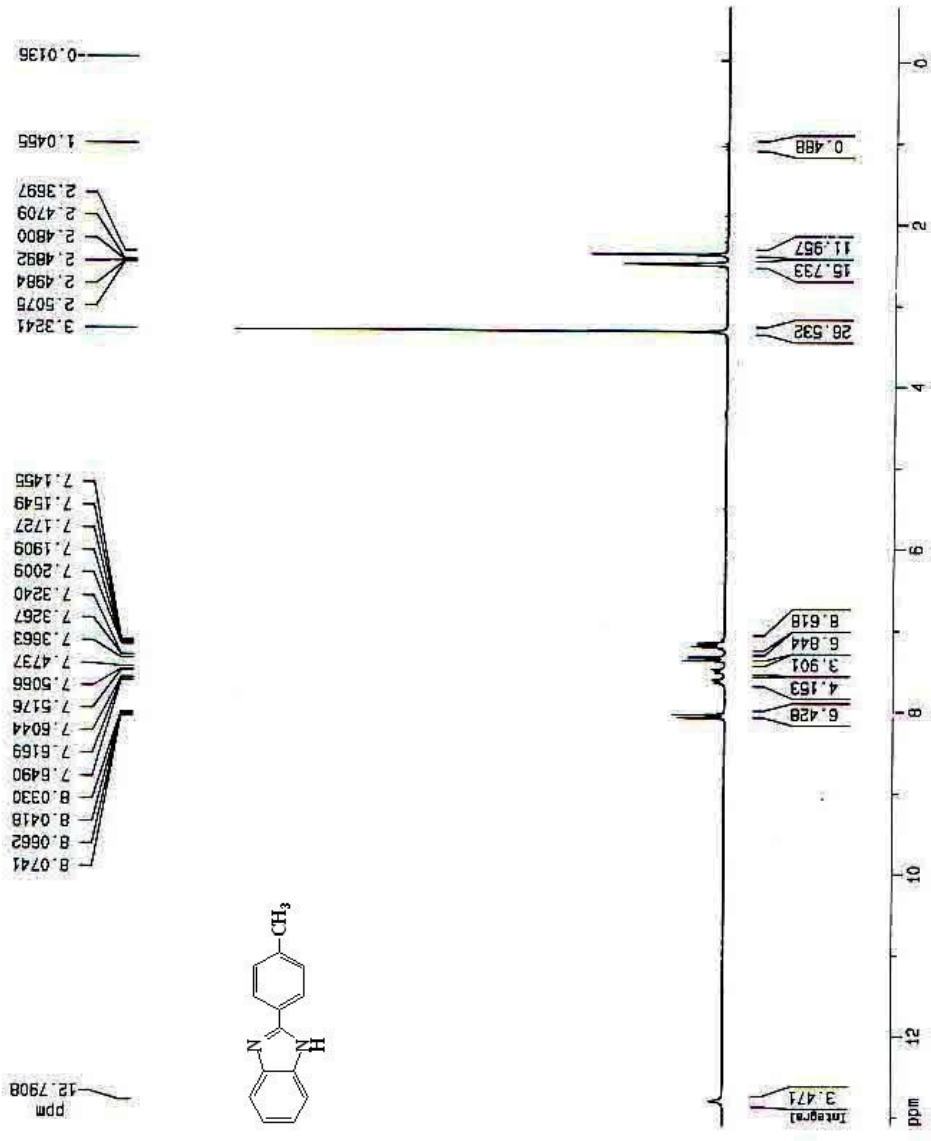

<sup>1</sup>H NMR spectra of 2-(p-Tolyl)-1H-benzimidazole

Current Data Parameters  
 NAME 13C  
 EXPNO 40  
 PROCNO 1

F2 - Acquisition Parameters  
 Date\_ 20130801  
 Time 14.19  
 INSTRUM spect  
 PROBHD 5 mm MSL100  
 PULPROG zgpg30  
 TD 65536  
 SOLVENT DMSO  
 NS 1071  
 DS 4  
 SMH 12562.814 Hz  
 FIDRES 0.191893 Hz  
 AQ 2.609827 sec  
 RG 4096  
 DW 39.800 usec  
 DE 7.50 usec  
 TE 300.0 K  
 D1 2.0000000 sec  
 D11 0.0500000 sec  
 D12 0.0000200 sec

CHANNEL F1  
 NUC1 13C  
 P1 10.00 usec  
 PL1 -5.00 dB  
 SF01 50.3282445 MHz

CHANNEL F2  
 CPDPRG2 waltz16  
 NUC2 1H  
 PCPD2 80.00 usec  
 PL2 120.00 dB  
 PL12 20.00 dB  
 PL13 20.00 dB  
 SF02 200.1308005 MHz

F2 - Processing parameters  
 SI 32768  
 SF 50.3227353 MHz  
 EQ 0  
 NSB 0  
 LB 1.00 Hz  
 GB 0  
 PC 1.40

3D NMR plot parameters  
 CX 20.00 cm  
 F1P 254.300 ppm  
 F1 13780.64 Hz  
 F2P -45.344 ppm  
 F2 -772.18 Hz  
 FREQH 12.4624 ppm/cm  
 HZCH 626.14069 Hz/cm

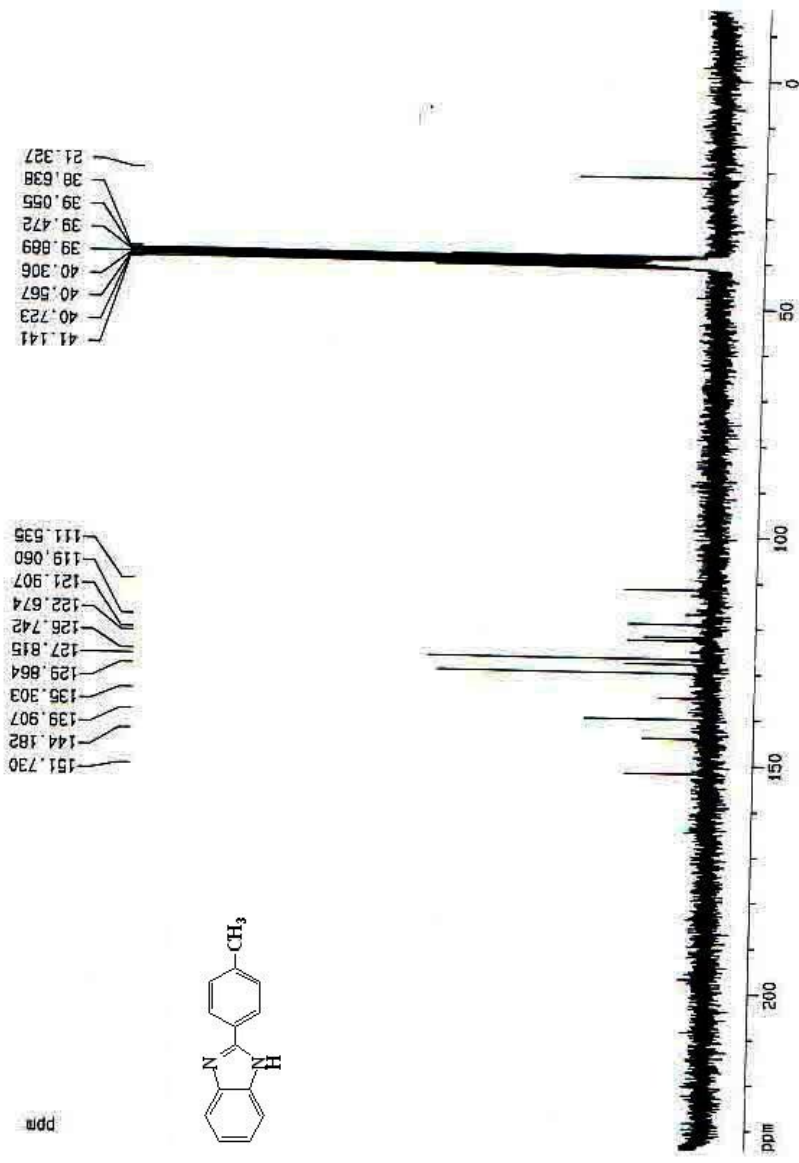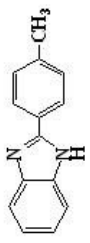

<sup>13</sup>CNMR spectra of 2-(p-Tolyl)-1H-benzimidazole



Current Data Parameters  
 NAME proton  
 EXPNO 96  
 PROCNO 1

F2 - Acquisition Parameters  
 Date\_ 20071111  
 Time 14.08  
 INSTRUM spect  
 PROBR0 5 mm Multinu  
 PULPROG zg30  
 TD 65536  
 SOLVENT DMSO  
 NS 12  
 DS 0  
 SWH 5885.204 Hz  
 FIDRES 0.091486 Hz  
 AQ 5.4657266 sec  
 RG 574.7  
 DK 83.400 usec  
 DE 7.50 usec  
 TE 300.0 K  
 D1 1.0000000 sec

CHANNEL f1  
 NUC1 1H  
 P1 10.70 usec  
 PL1 -2.00 dB  
 SFO1 200.1312465 MHz

F2 - Processing parameters  
 SI 32768  
 SF 200.1299719 MHz  
 NQW 0  
 SSB 0  
 LB 0.00 Hz  
 GB 0  
 PC 1.00

1D NMR plot parameters  
 CX 20.00 cm  
 FXP 21.344 ppa  
 F1 -4271.00 Hz  
 F2 -8.615 ppa  
 F2 -1724.21 Hz  
 PPMCM 1.49783 ppa/cm  
 RCM 299.76019 Hz/cm

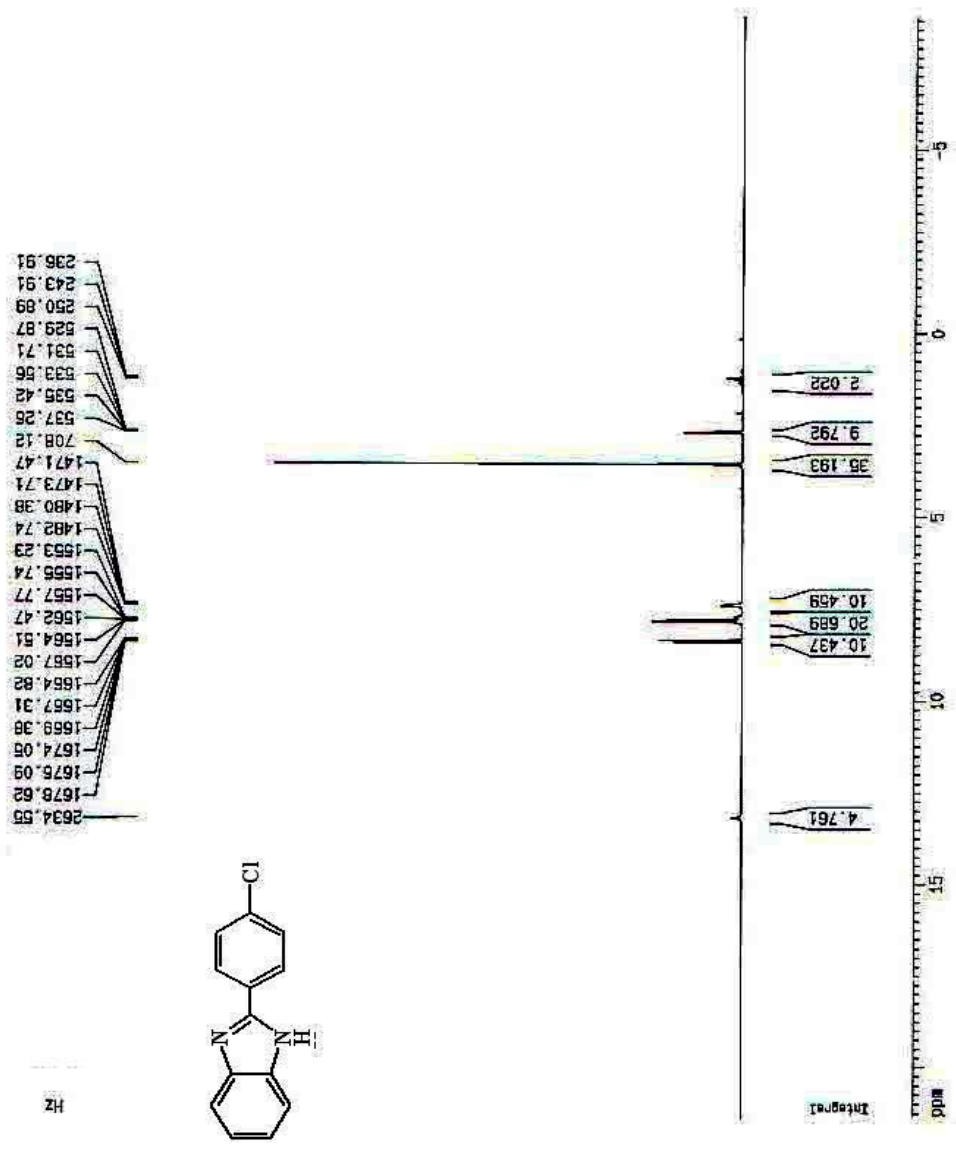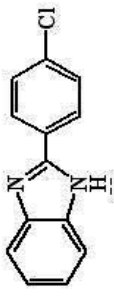

<sup>1</sup>H NMR spectra of 2-(4-Chlorophenyl)-1H-benzimidazole

Current Data Parameters  
 NAME C13  
 EXPNO 24  
 PROCNO 1

F2 - Acquisition Parameters  
 Date\_ 20130801  
 Time 15.05  
 INSTRUM spect  
 PROBHD 5 mm NUC1216  
 PULPROG zgpg30  
 ID 65586  
 SOLVENT DMSO  
 NS 1567  
 DS 1  
 SWH 12582.814 Hz  
 FIDRES 0.191693 Hz  
 AQ 2.6189367 sec  
 RG 4096  
 DW 39.800 usec  
 DE 7.50 usec  
 TE 300.0 K  
 D1 2.00000000 sec  
 D11 0.03000000 sec  
 D12 0.00002000 sec

CHANNEL F1  
 NUC1 13C  
 P1 10.00 usec  
 PL1 -8.00 dB  
 SFO1 50.3282445 MHz

CHANNEL F2  
 CPDPRG2 waltz16  
 NUC2 1H  
 P2 90.00 usec  
 PL2 120.00 dB  
 PL12 20.00 dB  
 PL13 20.00 dB  
 SFO2 200.1300905 MHz

F2 - Processing parameters  
 SI 32768  
 SF 50.3282314 MHz  
 MDN 0  
 EHQ 0  
 SSB 0  
 LB 1.00 Hz  
 GB 0  
 PC 1.40

1D NMR plot parameters  
 CX 20.00 cm  
 F1P 234.377 ppm  
 F1 11784.47 Hz  
 F2P -15.268 ppm  
 F2 -768.34 Hz  
 PRCHN 12.46265 ppm/cm  
 HZCM 628.14068 Hz/cm

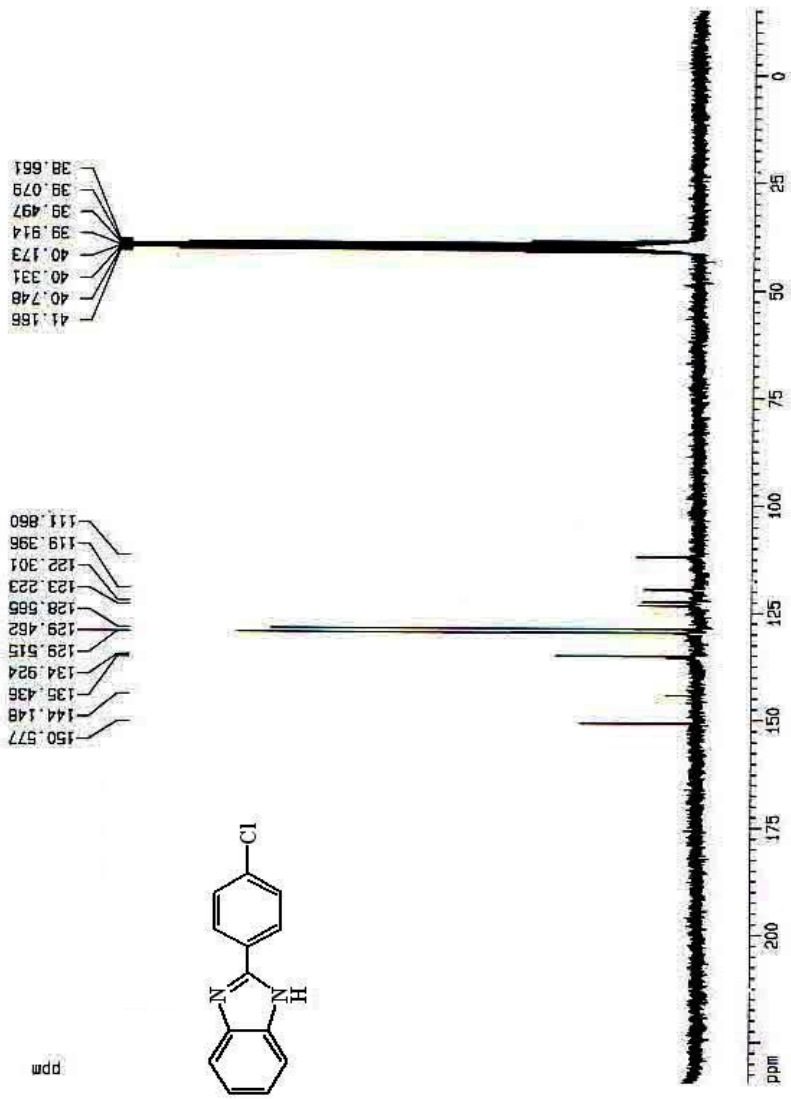

<sup>13</sup>C NMR spectra of 2-(4-Chlorophenyl)-1H-benzimidazole

Current Data Parameters  
 NAME H1  
 EXPNO 21  
 PROCNO 1

F2 - Acquisition Parameters  
 Date\_ 20130801  
 Time 8.27  
 INSTRUM spect  
 PROBHD 5 mm Multinu  
 PULPROG zg30  
 TD 65536  
 SOLVENT CDCl3  
 NS 12  
 DS 0  
 SH 5995.204 Hz  
 FIDRES 0.091460 Hz  
 AQ 5.4697926 sec  
 RG 256  
 DW 93.400 usec  
 DE 7.50 usec  
 TE 300.0 K  
 D1 1.00000000 sec

CHANNEL f1  
 NUC1 1H  
 PL 10.70 usec  
 PL1 -2.00 dB  
 SFO1 200.1312463 Mhz

F2 - Processing parameters  
 SI 32768  
 SF 200.1300116 Mhz  
 MVM EM  
 SSB 0  
 LB 0.00 Hz  
 GB 0  
 PC 1.00

ID NMR plot parameters  
 CX 20.00 cm  
 FIP 21.143 ppm  
 F1 4231.30 Hz  
 F2 -8.814 ppm  
 PPMCH 1.48753 ppm/cm  
 HCM 298.76019 Hz/cm

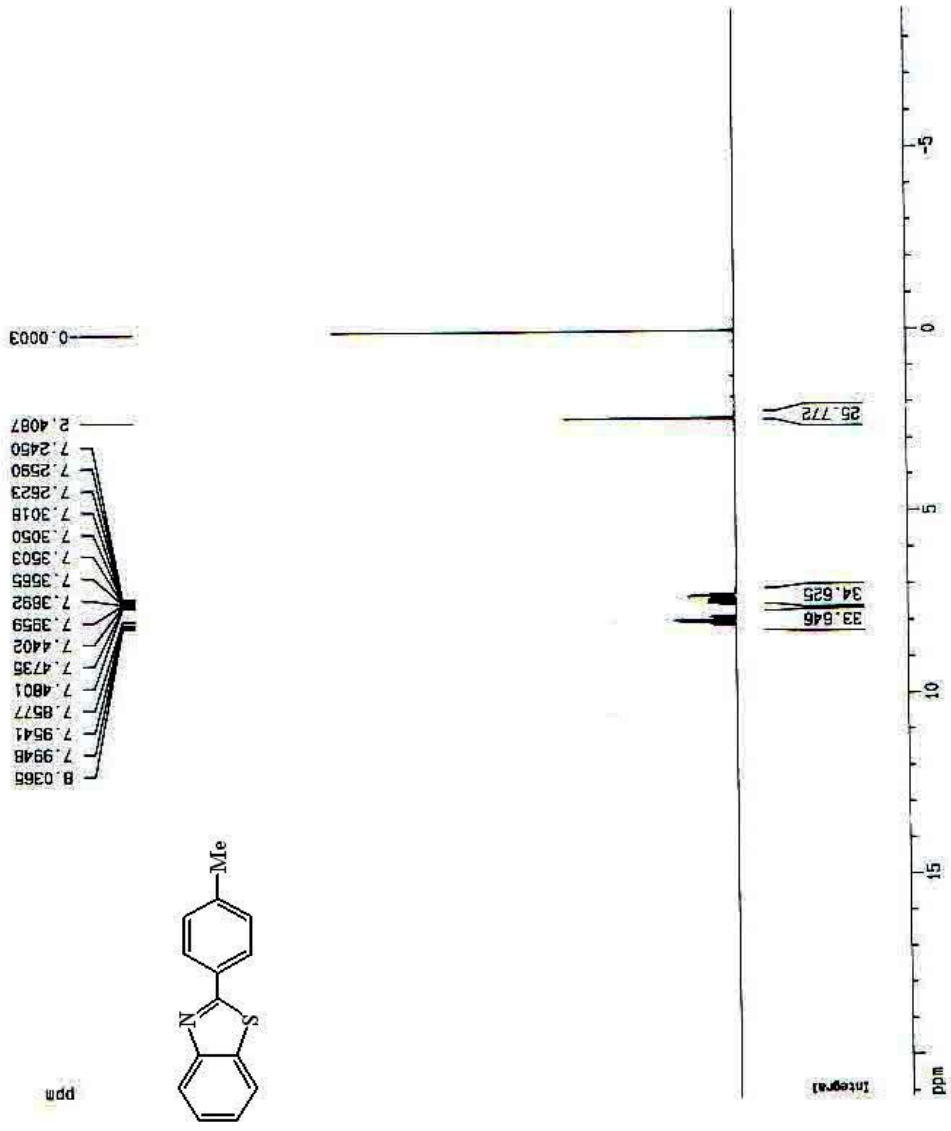

<sup>1</sup>H NMR spectra of 2-(p-Tolyl)benzothiazole

```

Current Data Parameters
NAME      C13
EXPNO    20
PROCNO   1

F2 - Acquisition Parameters
Date_    20130801
Time     5.44
INSTRUM spect
PROBHD   5 mm NUK11HN
PULPROG zgpg30
TD        65536
SOLVENT  CDCl3
NS        321
DS        4
SWH       12562.814 Hz
FIDRES    0.191693 Hz
AQ        2.5695927 sec
RG        32768
DN        38.800 uSec
DE        7.50 uSec
TE        300.0 K
D1        2.00000000 sec
D11       0.03000000 sec
D12       0.00002000 sec

===== CHANNEL f1 =====
NUC1      13C
P1        10.00 uSec
PL1       -5.00 dB
SFO1      50.3282440 MHz

===== CHANNEL f2 =====
CPDPRG2  waltz16
NUC2      1H
P2        80.00 uSec
PL2       120.00 dB
PL12      20.00 dB
PL13      20.00 dB
SFO2      200.1306805 MHz

F2 - Processing parameters
SI        32768
SF        50.327090 MHz
WDW       EM
SSB       0
LB        1.00 Hz
GB        0
PC        1.40

3D NMR plot parameters
CX        20.00 cm
F1P       234.813 ppm
F1        11915.42 Hz
F2P       -14.852 ppm
F2        -76.40 Hz
PPHOCM    12.46225 ppm/cm
HCOH      628.14055 Hz/cm

```

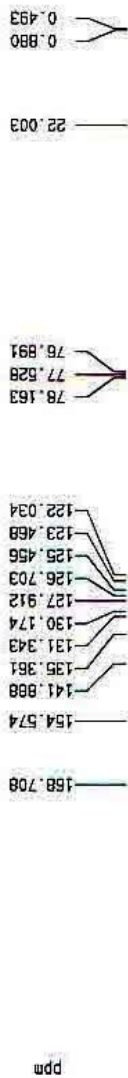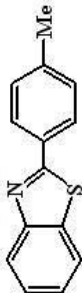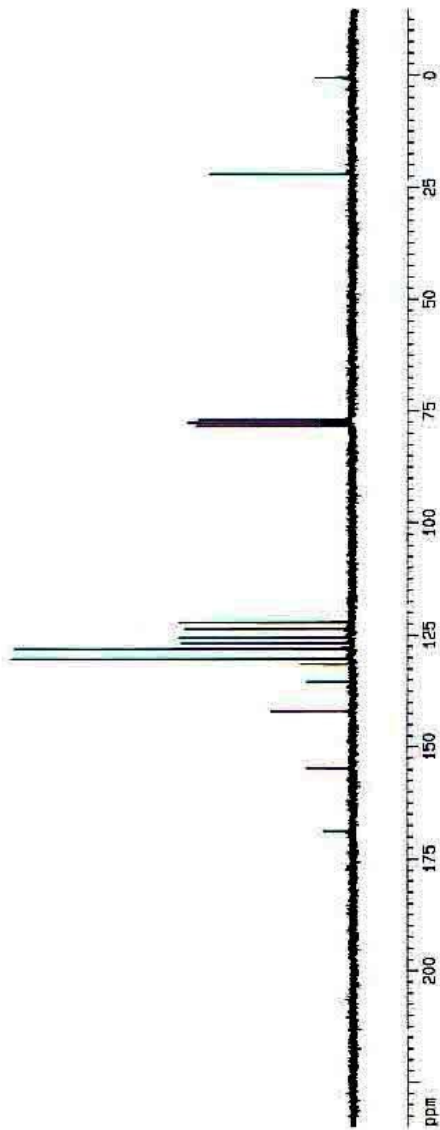

<sup>13</sup>C NMR spectra of 2-(p-Tolyl)benzothiazole

NAME FENG2004-71.78

EXPNO 40

PROCNO 1

Date\_ 20130901

Time 1.09

INSTRUM spect

PROBHD 5 mm PABBO BB-

PULPROG zg

TD 32768

SOLVENT DMSO

NS 32

DS 2

SF 8417.508 Hz

FIDRES 0.256982 Hz

AQ 1.9464682 sec

RG 101

DW 68.400 usec

DE 6.50 usec

TE 295.7 K

D1 1.0000000 sec

TD0 1

CHANNEL1

NUC1 1H

P1 11.00 usec

PL1 -2.00 dB

PL1W 17.51671600 W

SFO1 400.1326008 MHz

SI 32768

SF 400.1300000 MHz

WDW EM

SSB 0

LB 0.30 Hz

GB 0

PC 1.00

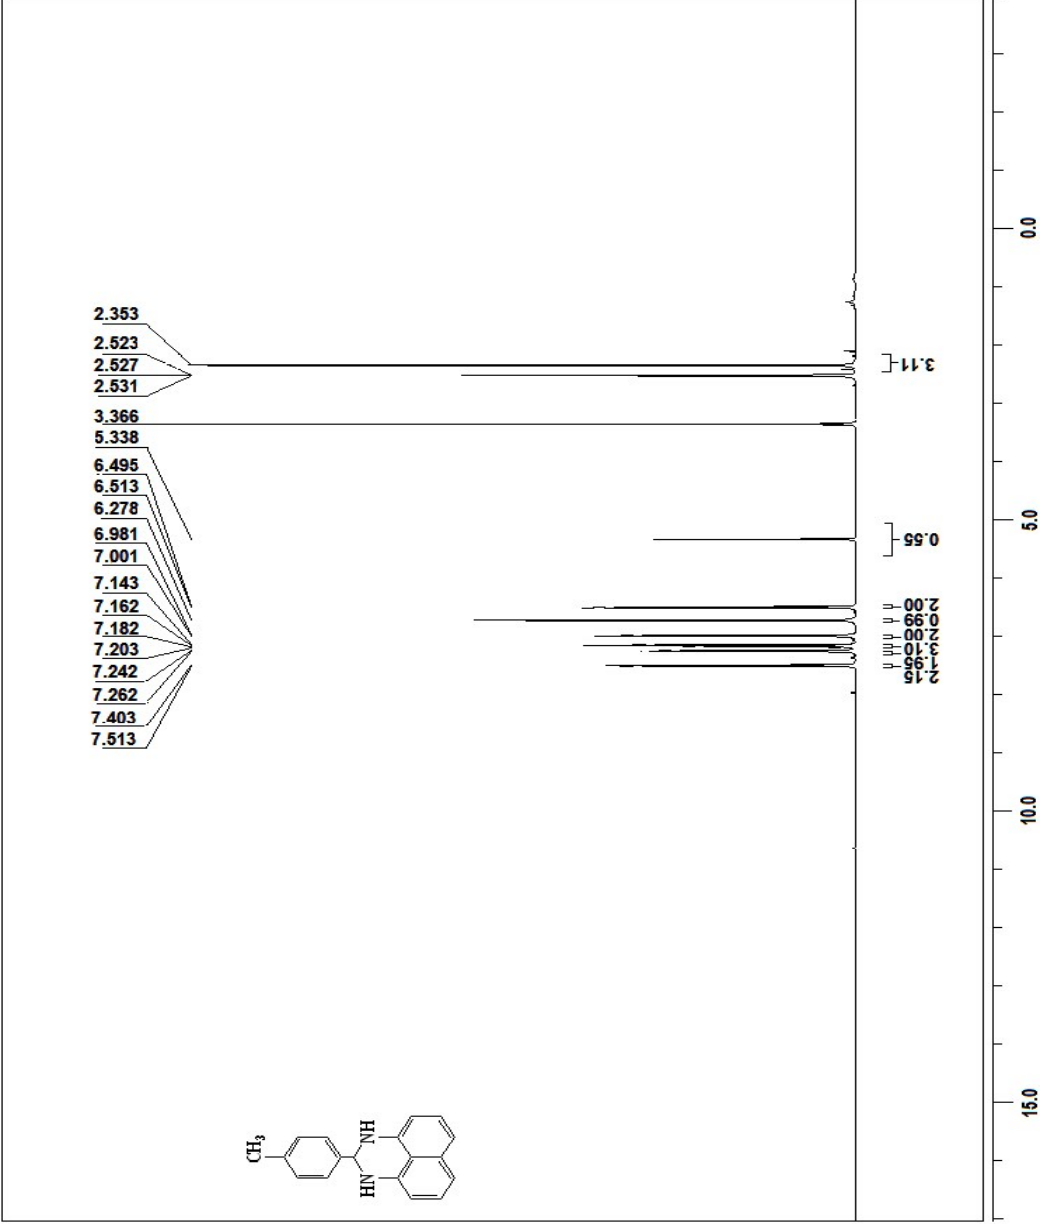

<sup>1</sup>H NMR spectra of 2-(p-Tolyl)-2,3-dihydro-1H-perimidine

NAME F-EN20094-71\_78  
 EXPNO 41  
 PROCNO 1  
 Date\_ 20130901  
 Time 1.53  
 INSTRUM spect  
 PROBHD 5 mm PABBO BB-  
 PULPROG zgpg30  
 TD 32768  
 SOLVENT DMSO  
 NS 1600  
 DS 2  
 SWH 25252.525 Hz  
 FIDRES 0.770646 Hz  
 AQ 0.6488564 sec  
 RG 2050  
 DW 19.900 usec  
 DE 6.50 usec  
 TE 296.2 K  
 D1 1.00000000 sec  
 D11 0.03000000 sec  
 TDD 1

CHANNEL 11  
 NUC1 13C  
 P1 8.70 usec  
 PL1 -1.00 dB  
 PL1W 42.68075012 W  
 SFO1 100.6233654 MHz

CHANNEL 12  
 CPDPRG2 waltz16  
 NUC2 1H  
 PCPDZ 80.00 usec  
 PL2 0.00 dB  
 PL12 15.26 dB  
 PL13 18.26 dB  
 PL2W 11.05230045 W  
 PL12W 0.32919458 W  
 PL13W 0.16489812 W  
 SFO2 400.1316005 MHz  
 SI 32768  
 SF 100.6128163 MHz  
 WDW EM  
 SSB 0  
 LB 1.00 Hz  
 GB 0  
 PC 1.40

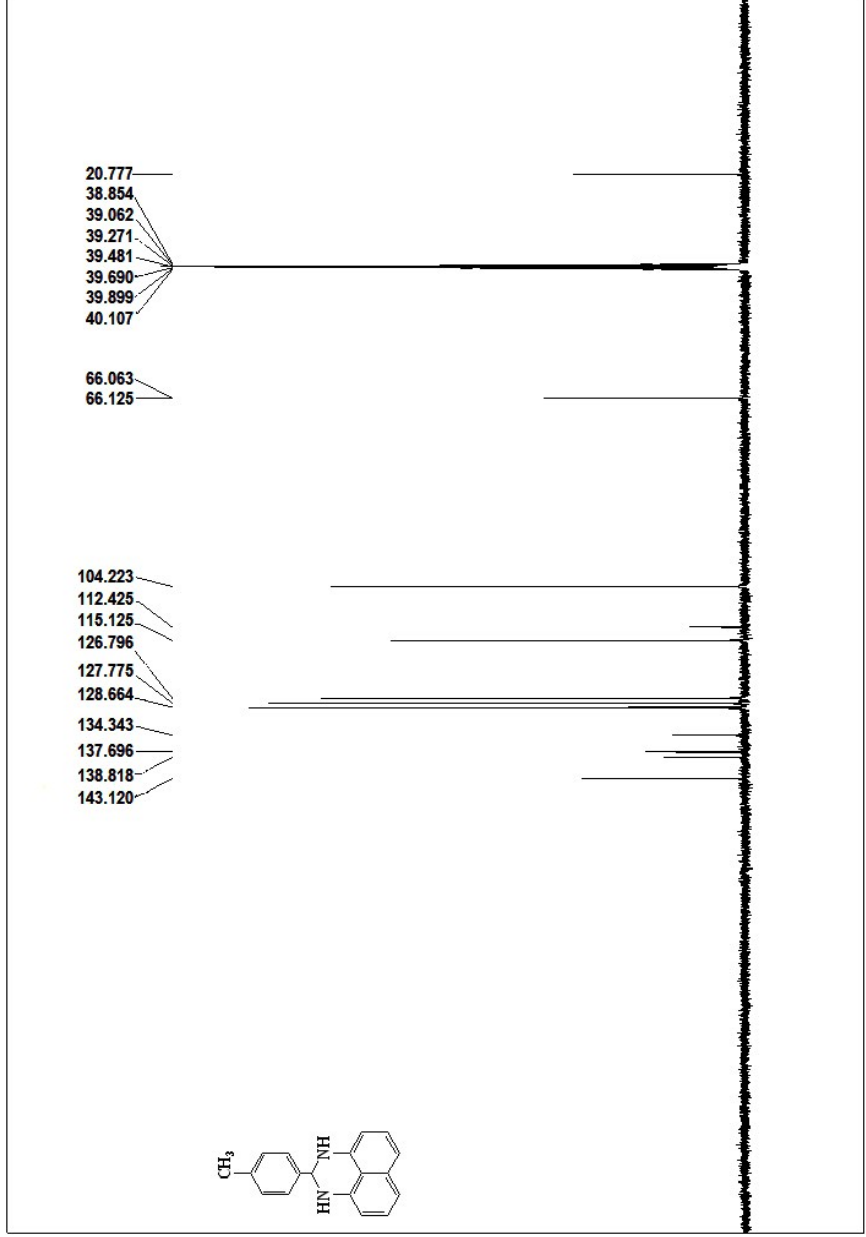

<sup>13</sup>CNMR spectra of 2-(p-Tolyl)-2,3-dihydro-1H-perimidine

NAME F:ENZ0004-71\_78  
 EXPNO 30  
 PROCNO 1  
 Date\_ 20130801  
 Time 0.21  
 INSTRUM spect  
 PROBHD 5 mm PABBO BB-  
 PULPROG zg

TD 32768  
 SOLVENT DMSO  
 NS 32  
 DS 2  
 SWH 8417.508 Hz  
 FIDRES 0.256882 Hz  
 AQC 1.9464832 sec  
 RG 101  
 DW 58.400 usec  
 DE 6.50 usec  
 TE 295.7 K  
 D1 1.00000000 sec  
 TD0 1

CHANNEL f1  
 NUC1 1H  
 P1 11.00 usec  
 PL1 -2.00 dB  
 PL1W 17.51671600 W  
 SFO1 400.1326008 MHz  
 SI 32768  
 SF 400.130000 MHz  
 WDW EM  
 SSB 0  
 LB 0.30 Hz  
 GB 0  
 PC 1.00

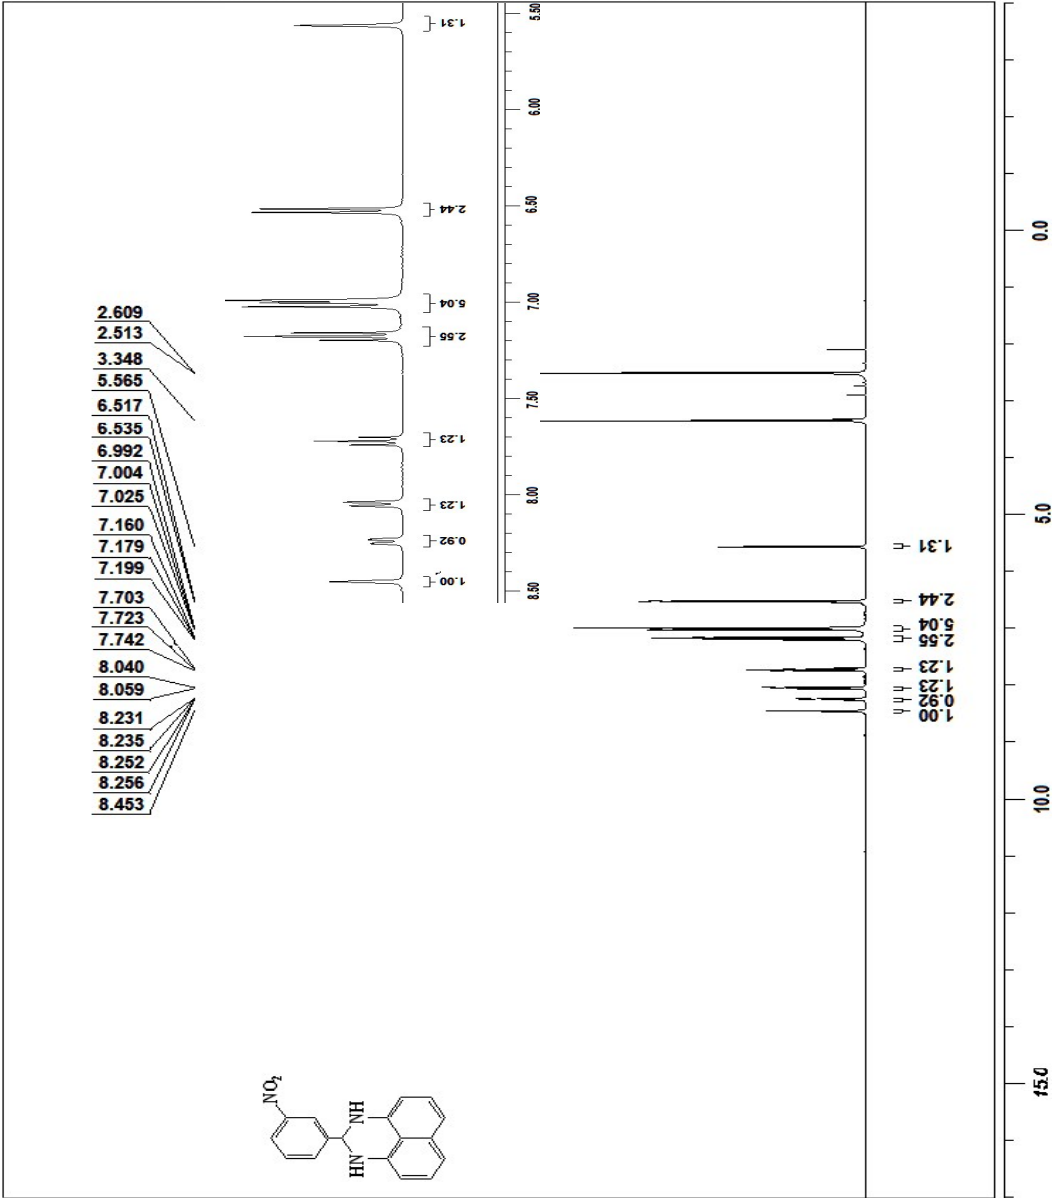

<sup>1</sup>H NMR spectra of 2-(3-Nitrophenyl)-2,3-dihydro-1H-perimidine

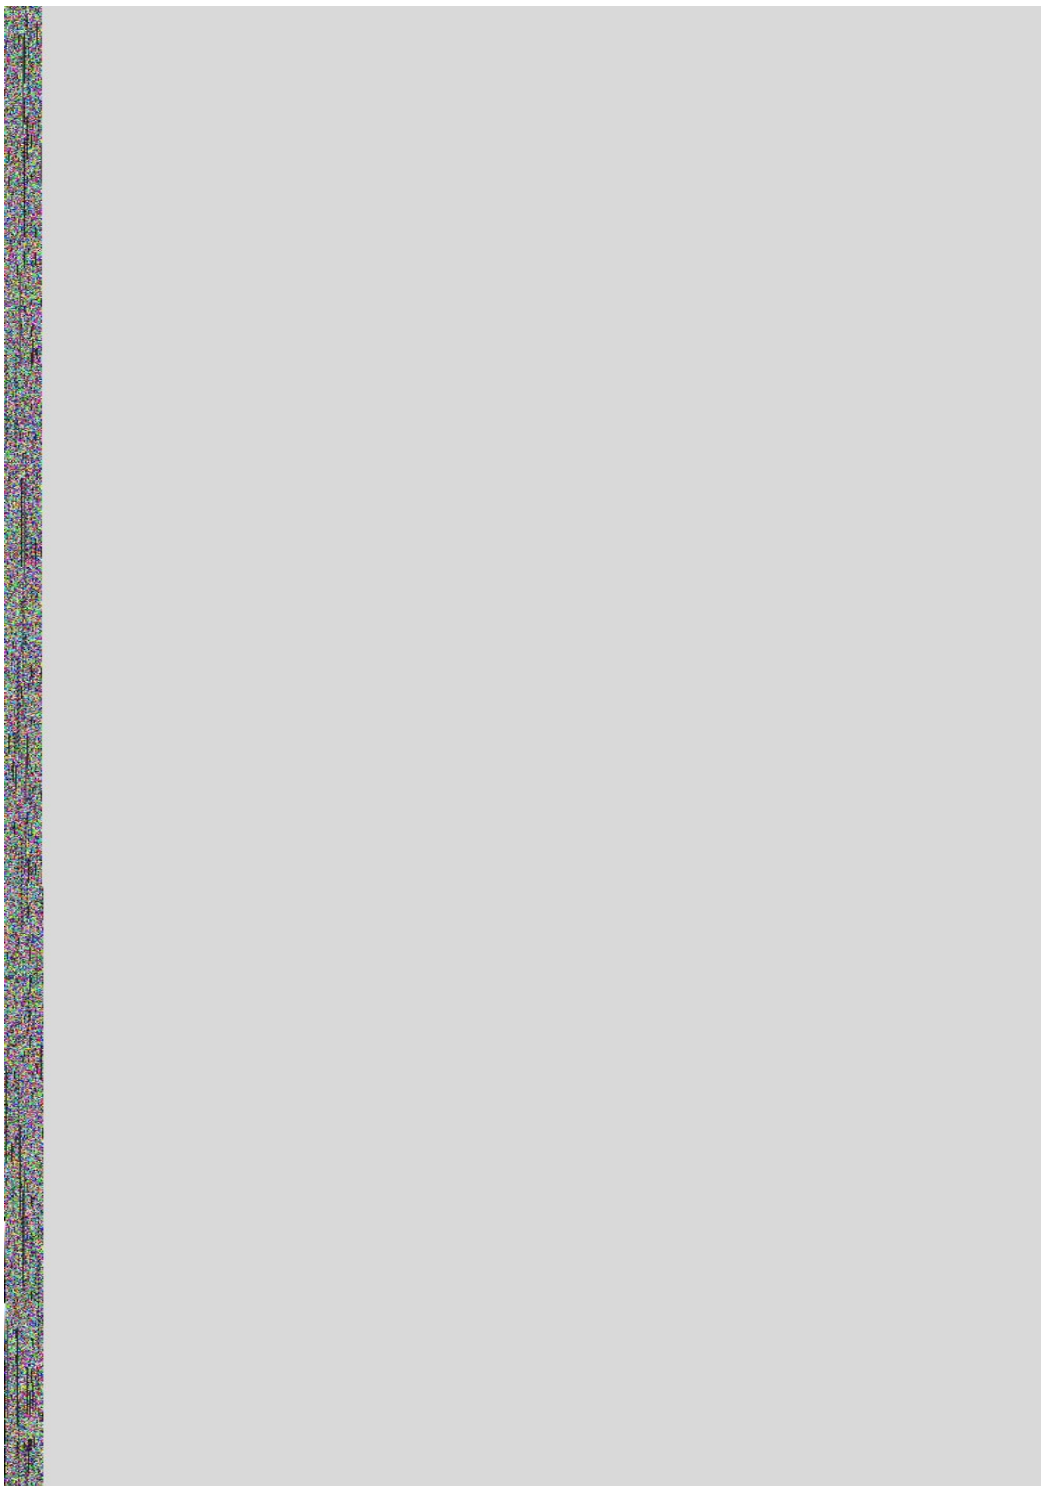

**<sup>1</sup>HNMR spectra of 2-(3-Nitrophenyl)-2,3-dihydro-1H-perimidine**



NAME F-ENG20004-71..78  
 EXPNO 31  
 PROCNO 1  
 Date\_ 20130901  
 Time 1.05  
 INSTRUM spect  
 PROBHID 5 mm PABBO BB-  
 PULPROG zgpg30  
 TD 32768  
 SOLVENT DMSO  
 NS 1600  
 DS 2  
 SWH 25252.525 Hz  
 FWHM 0.770646 Hz  
 AQ 0.6488564 sec  
 RG 2050  
 DW 18.800 usec  
 DE 6.50 usec  
 TE 296.3 K  
 D1 1.00000000 sec  
 D11 0.03000000 sec  
 TD0 1

CHANNEL F1  
 NUC1 13C  
 P1 8.70 usec  
 PL1 -1.00 dB  
 PL1W 42.68075012 W  
 SFO1 100.628364 MHz

CHANNEL F2  
 CPDPRG2 waltz16  
 NUC2 1H  
 PCPDZ 80.00 usec  
 PL2 0.00 dB  
 PL12 15.26 dB  
 PL13 18.26 dB  
 PL2W 11.05230045 W  
 PL12W 0.32819458 W  
 PL13W 0.16498812 W  
 SFO2 400.1316005 MHz  
 SI 32768  
 SF 100.6128183 MHz  
 WDW EM  
 SSB 0  
 LB 1.00 Hz  
 GB 0  
 PC 1.40

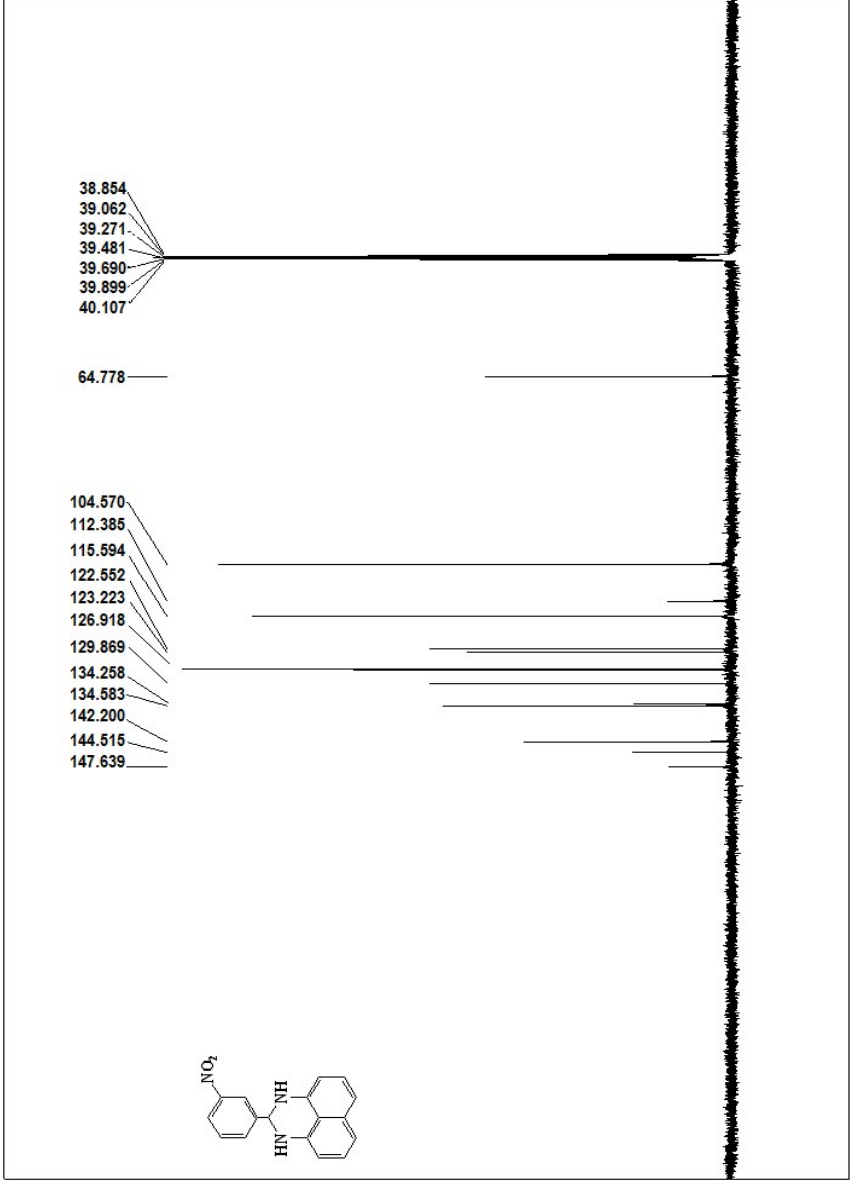

<sup>13</sup>CNMR spectra of 2-(3-Nitrophenyl)-2,3-dihydro-1H-perimidine
